# Supplementary material
Source: ML conference proceedings conference paper supplement (https://openaccess.thecvf.com/content/CVPR2023/html/Li_Super-CLEVR_A_Virtual_CVPR_2023_paper.html)
Supplement: Supplementary file 1 [file Li_Super-CLEVR_A_Virtual_CVPR_2023_supplemental.zip]

## A. Dataset statistics

Fig. 4 shows the distribution of question types in the Super-CLEVR dataset. The question type is determined by the type of the last operation in the question program.

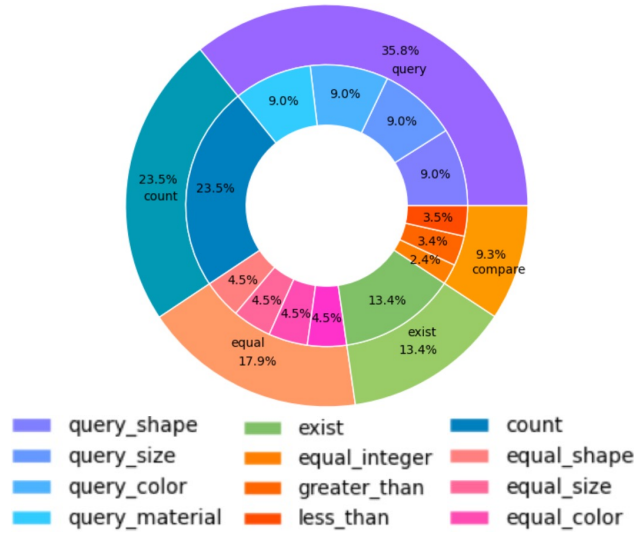

Figure 4. Distribution of question types in Super-CLEVR.

## B. List of objects

Super-CLEVR contains 21 objects from 5 categories: airplane, bicycle, bus, car and motorcycle. They are shown in Fig. 5 and Tab. 4.

| category   | objects                                              |
|------------|------------------------------------------------------|
| airplane   | airliner, biplane, jet, fighter                      |
| bicycle    | utility bike, tandem bike, road bike, mountain bike  |
| bus        | articulated bus, double bus, regular bus, school bus |
| car        | truck, suv, minivan, sedan, wagon                    |
| motorcycle | chopper, scooter, cruiser, dirtbike                  |

Table 4. Super-CLEVR dataset contains 21 objects from 5 categories.

## C. Dataset controlling

Fig. 6 shows the concept distribution for dataset variants *bal*, *slt* and *long*; and variants *head*, *tail* and *oppo* for testing purpose. Fig. 7 shows the concept co-distribution Matrix  $M$  for controlling the concept compositionality (for variants *co-0*, *co-1* and *co-2*). The descriptions for the variants are in Sec. 3.3.

## D. Definition of Relative Degrade

Here we describe *Relative Degrade* for each domain shift factors. We use  $A_j^i$  to denote the accuracy of model trained using data variant  $i$  and tested with data variant  $j$ .

Visual complexity:

$$RD = Avg(\frac{A_{easy}^{easy} - A_{mid}^{easy}}{A_{easy}^{easy}}, \frac{A_{easy}^{easy} - A_{hard}^{easy}}{A_{easy}^{easy}}, \frac{A_{mid}^{mid} - A_{easy}^{mid}}{A_{mid}^{mid}}, \frac{A_{mid}^{mid} - A_{hard}^{mid}}{A_{mid}^{mid}}, \frac{A_{hard}^{hard} - A_{easy}^{hard}}{A_{hard}^{hard}}, \frac{A_{hard}^{hard} - A_{mid}^{hard}}{A_{hard}^{hard}})$$



Question redundancy,

$$RD = Avg(\frac{A_{rd-}^{rd-} - A_{rd-}^{rd-}}{A_{rd-}^{rd-}}, \frac{A_{rd-}^{rd-} - A_{rd+}^{rd-}}{A_{rd-}^{rd-}}, \frac{A_{rd-}^{rd-} - A_{rd+}^{rd-}}{A_{rd-}^{rd-}}, \frac{A_{rd-}^{rd-} - A_{rd+}^{rd-}}{A_{rd-}^{rd-}}, \frac{A_{rd+}^{rd-} - A_{rd+}^{rd-}}{A_{rd+}^{rd-}}, \frac{A_{rd+}^{rd-} - A_{rd+}^{rd-}}{A_{rd+}^{rd-}})$$

Concept distribution,

$$RD = \frac{1}{3} \sum_{k \in S} \frac{(A_{head}^k - A_{tail}^k) + (A_{long}^k - A_{oppo}^k)}{2 \cdot A_k^k}, S = \{bal, slt, long\}$$

Concept compositionality,

$$RD = Avg(\frac{A_{co-0}^{co-0} - A_{co-1}^{co-0}}{A_{co-0}^{co-0}}, \frac{A_{co-0}^{co-0} - A_{co-2}^{co-0}}{A_{co-0}^{co-0}}, \frac{A_{co-1}^{co-1} - A_{co-0}^{co-1}}{A_{co-1}^{co-1}}, \frac{A_{co-1}^{co-1} - A_{co-2}^{co-1}}{A_{co-1}^{co-1}}, \frac{A_{co-2}^{co-2} - A_{co-0}^{co-2}}{A_{co-2}^{co-2}}, \frac{A_{co-2}^{co-2} - A_{co-1}^{co-2}}{A_{co-2}^{co-2}})$$

## E. More details about P-NSVQA

Given a image containing  $n$  objects, we maintain a vector of probability  $\mathbf{p} = [p^1, p^2, \dots, p^n]$ , where  $p^k$  means the probability that object  $k$  is selected. We update  $\mathbf{p}$  when executing the reasoning operations step by step. In the following, we describe how to compute  $\mathbf{p}$  for each kind of operations.

- *scene*  
Initialize all the values in  $\mathbf{p}$  to 1.
- *filter\_identifier[attribute]* (e.g. *filter\_color[red]*)  
For object  $k$ ,

$$p^k = p^k * P_{attribute}^k$$

Here  $P_{attribute}^k$  is the probability of object  $k$  having the *attribute*, which is predicted by the visual scene parsing model.

- *relate\_spacial* (including *relate\_behind*, *relate\_front*, *relate\_right*, *relate\_left*)

The output of the *relate* operation is the probabilities of each object being on the *spacial* side of the given object. For example, *relate\_left(i)* computes the probabilities of objects to be on the left side of the given object  $i$ .

$$p_{front}^k = \frac{1}{1 + e^{-b[(y_k - y_i) + a]}}$$

$$p_{behind}^k = \frac{1}{1 + e^{-b[(y_i - y_k) + a]}}$$

$$p_{right}^k = \frac{1}{1 + e^{-b[(x_k - x_i) + a]}}$$

$$p_{left}^k = \frac{1}{1 + e^{-b[(x_i - x_k) + a]}}$$

Here  $i$  is the input object and  $(x_i, y_i)$  is the center of it.  $a$  and  $b$  are hyperparameters. In our experiments, we set  $a = 20$  and  $b = 0.02$ .

- *same\_color*, *same\_shape*, *same\_size*, *same\_material*

The *same* operation returns the probabilities of each object having the same attribute as the given object  $i$ . For example, for object  $k$  and attribute *color*,

$$p^k = cosine\_similarity(P_{color}^k, P_{color}^i)$$



1404  
1405  
1406  
1407  
1408  
1409  
1410  
1411  
1412  
1413  
1414  
1415  
1416  
1417  
1418  
1419  
1420  
1421  
1422  
1423  
1424  
1425  
1426  
1427  
1428  
1429  
1430  
1431  
1432  
1433  
1434  
1435  
1436  
1437  
1438  
1439  
1440  
1441  
1442  
1443  
1444  
1445  
1446  
1447  
1448  
1449  
1450  
1451  
1452  
1453  
1454  
1455  
1456  
1457

- *intersect, union*  
Given two probability vectors  $\mathbf{p}_1, \mathbf{p}_2$ , we calculate their intersection or union:

$$\text{Intersection} : \mathbf{p} = \mathbf{p}_1 \odot \mathbf{p}_2$$

$$\text{Union} : \mathbf{p} = 1 - (1 - \mathbf{p}_1) \odot (1 - \mathbf{p}_2)$$

Here  $\odot$  is the pointwise product.

1458  
1459  
1460  
1461  
1462  
1463  
1464  
1465  
1466  
1467  
1468  
1469  
1470  
1471  
1472  
1473  
1474  
1475  
1476  
1477  
1478  
1479  
1480  
1481  
1482  
1483  
1484  
1485  
1486  
1487  
1488  
1489  
1490  
1491  
1492  
1493  
1494  
1495  
1496  
1497  
1498  
1499  
1500  
1501  
1502  
1503  
1504  
1505  
1506  
1507  
1508  
1509  
1510  
1511



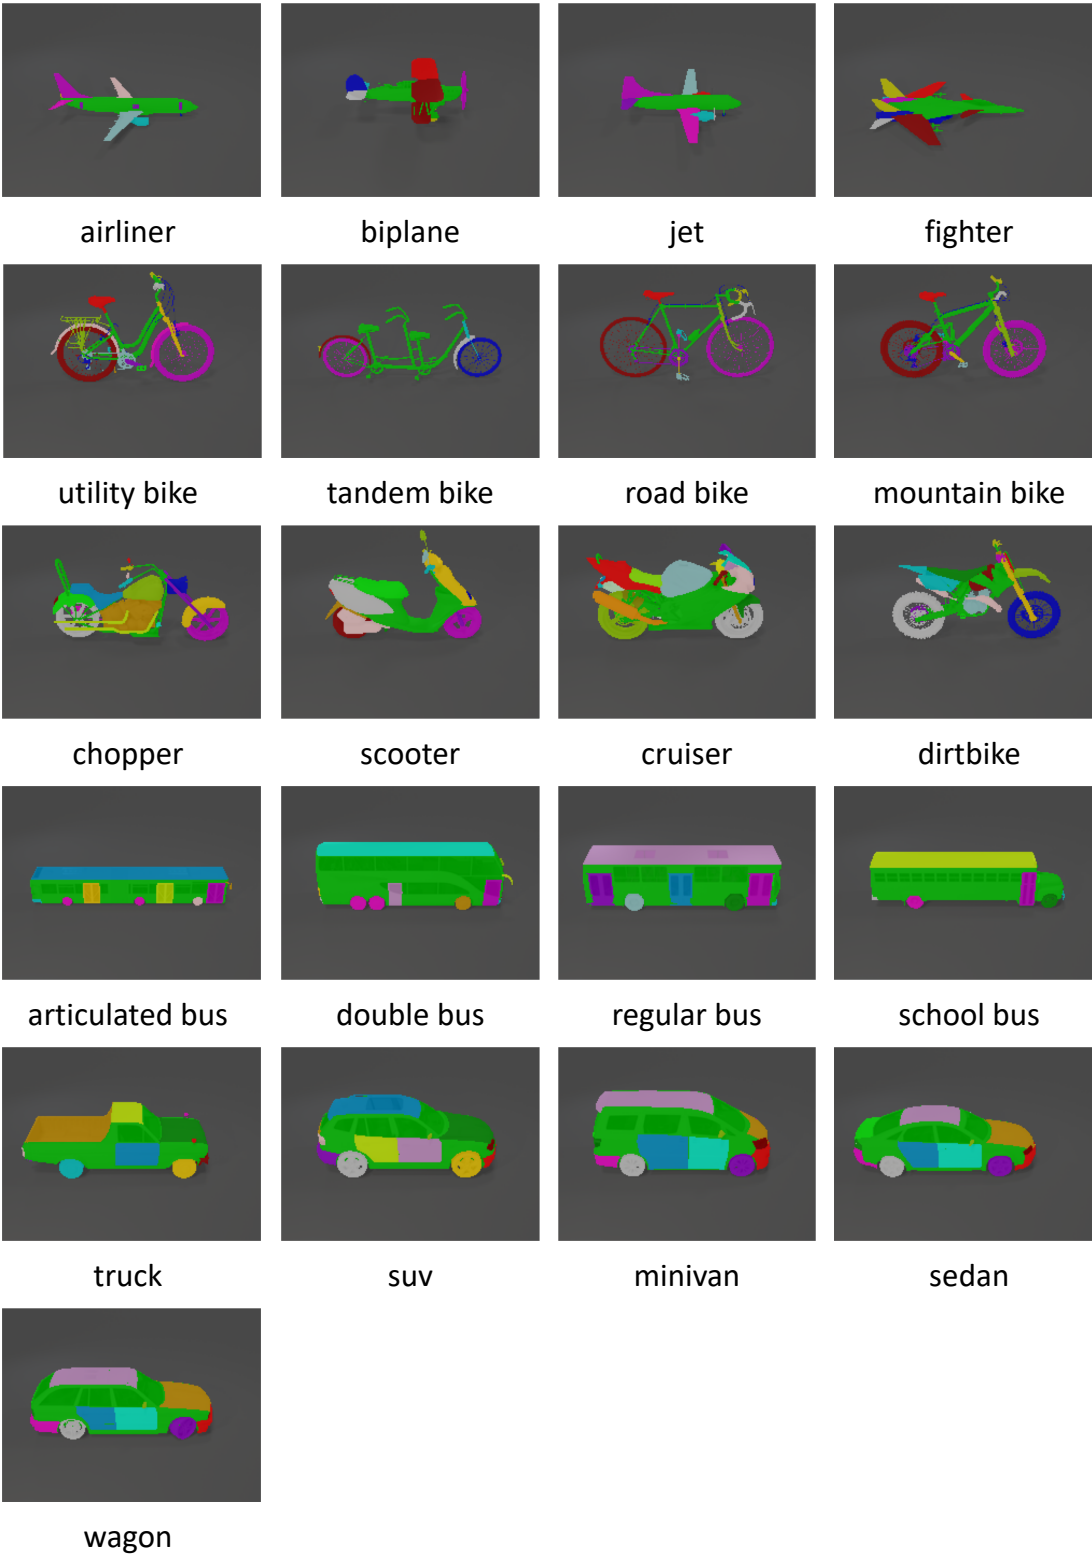

Figure 5. There are 21 objects belonging to 5 categories in the Super-CLEVR dataset.



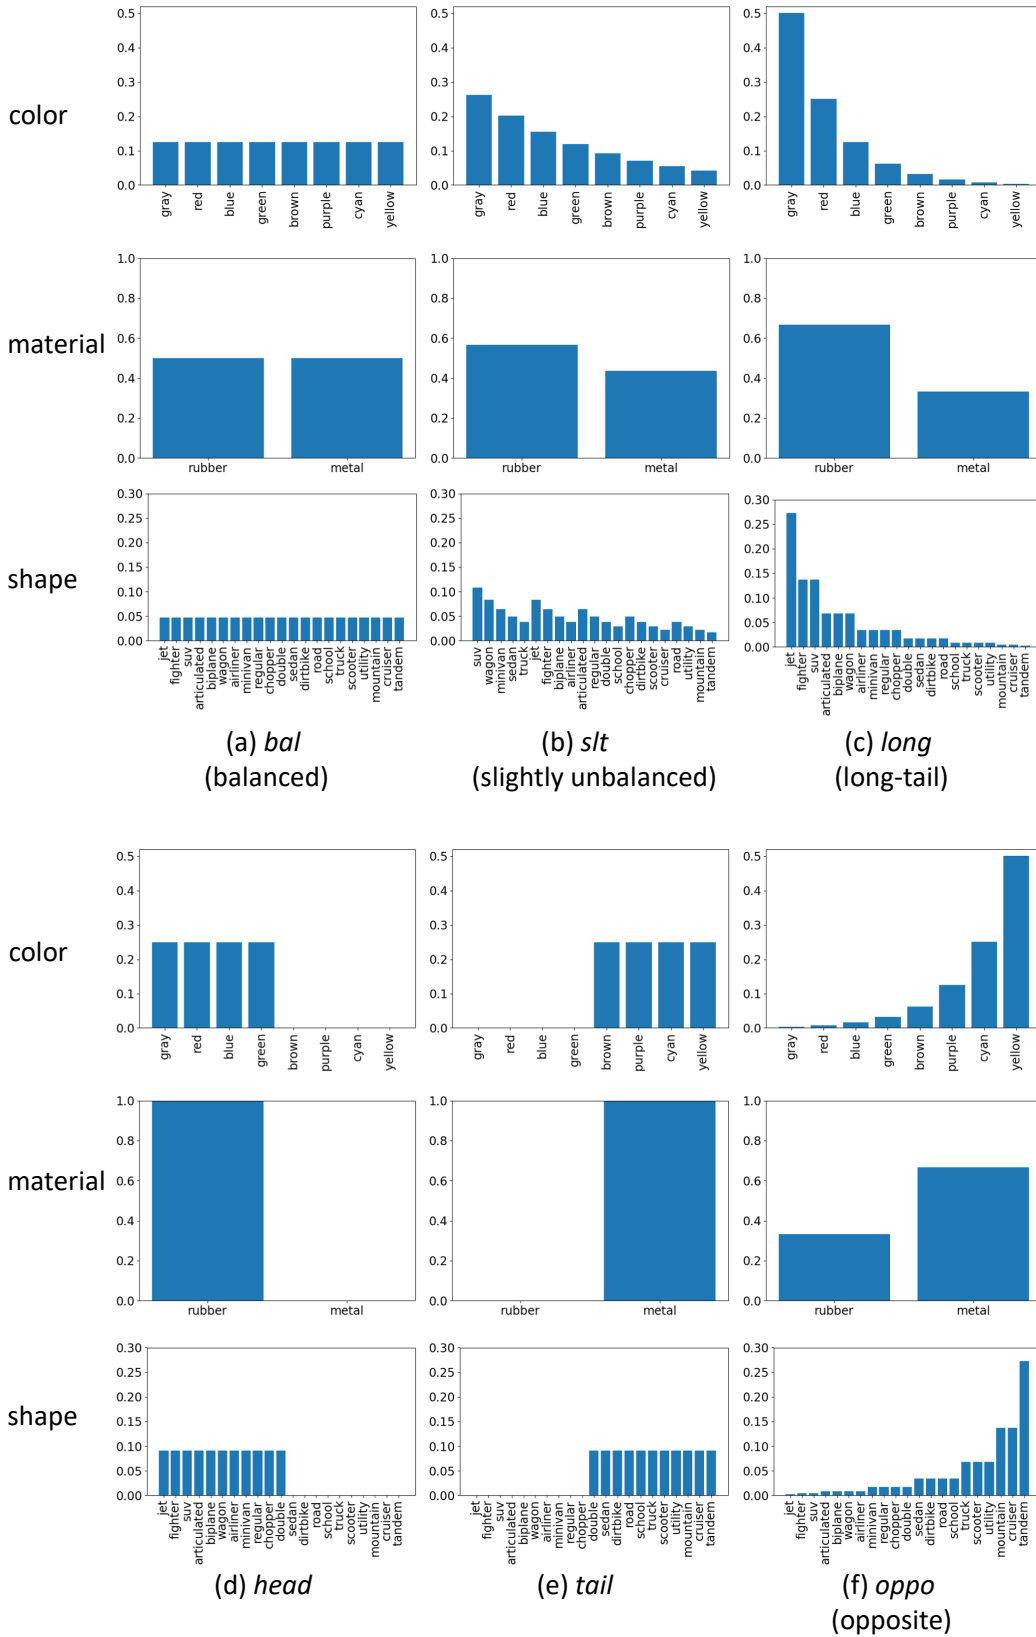

Figure 6. Concept distribution for dataset variants *bal*, *slt*, *long*, *head*, *tail* and *oppo*.



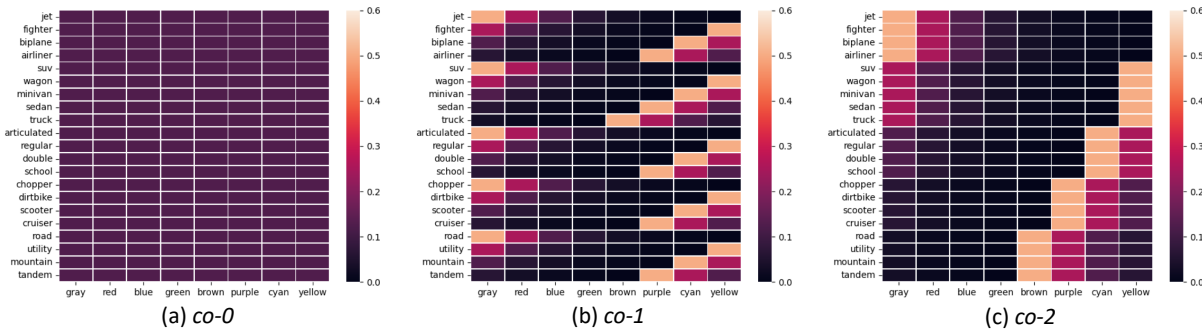

Figure 7. Concept co-distribution matrix  $M$  for dataset variants  $co-0$ ,  $co-1$  and  $co-2$ .
